# Supplementary material for: Synthesis of a series of rare-earth-based multi-anion chalcogenide iodides RE3Si2SexS8−xI (RE = La, Ce, Pr, and Nd) using the flux-assisted boron–chalcogen mixture method
Source: Royal Society of Chemistry journal article supplement (doi:10.1039/d4dt03506b), 2025-01-01
Supplement: d4dt03506b1.pdf [file d4dt03506b1.pdf]

Supporting Information

Synthesis of a Series of Rare-Earth-based Multi Anion Chalcogenide Iodides:  
 $RE_3Si_2Se_xS_{8-x}I$  (RE = La, Ce, Pr, and Nd)  
Flux-Assisted Boron Chalcogen Mixture Method Crystal Growth and  
Characterization of Magnetic, Optical, and Photoluminescent Properties

Gopabandhu Panigrahi, Habiba B. Kashem, Gregory Morrison, and Hans-Conrad zur Loye\*

Department of Chemistry and Biochemistry, University of South Carolina, Columbia, SC, 29208,  
United States

\*E-mail: [zurloye@mailbox.sc.edu](mailto:zurloye@mailbox.sc.edu)

**Table S1. Semi-quantitative elemental compositions determined by EDS.**

| <b><math>La_3Si_2Se_{1.21}S_{6.79}I</math></b> |      |      |      |      |      |
|------------------------------------------------|------|------|------|------|------|
| <b>Element</b>                                 | La   | Si   | Se   | S    | I    |
| <b>Weight%</b>                                 | 43.3 | 7.2  | 13.2 | 23.1 | 13.2 |
| <b>Atomic%</b>                                 | 20.0 | 16.4 | 10.7 | 46.2 | 6.7  |
| <b><math>Ce_3Si_2Se_{1.39}S_{6.61}I</math></b> |      |      |      |      |      |
| <b>Element</b>                                 | Ce   | Si   | Se   | S    | I    |
| <b>Weight%</b>                                 | 46.3 | 6.8  | 10.2 | 23.5 | 13.2 |
| <b>Atomic%</b>                                 | 22.1 | 14.4 | 10.6 | 46.2 | 6.7  |
| <b><math>Pr_3Si_2Se_{1.22}S_{6.78}I</math></b> |      |      |      |      |      |
| <b>Element</b>                                 | Pr   | Si   | Se   | S    | I    |
| <b>Weight%</b>                                 | 48.3 | 6.1  | 9.8  | 23.1 | 12.7 |
| <b>Atomic%</b>                                 | 22.8 | 14.5 | 8.2  | 47.8 | 6.7  |
| <b><math>Nd_3Si_2Se_{1.18}S_{6.82}I</math></b> |      |      |      |      |      |
| <b>Element</b>                                 | Nd   | Si   | Se   | S    | I    |
| <b>Weight%</b>                                 | 49.2 | 6.4  | 3.6  | 25.6 | 15.2 |
| <b>Atomic%</b>                                 | 22.2 | 14.9 | 3.1  | 52.0 | 7.8  |

**Table S2. Fractional atomic coordinates and atomic parameters.**

| <b>La<sub>3</sub>Si<sub>2</sub>Se<sub>1.21</sub>S<sub>6.79</sub>I</b> |              |             |               |            |            |            |
|-----------------------------------------------------------------------|--------------|-------------|---------------|------------|------------|------------|
| <b>Atom</b>                                                           | <b>Wyck.</b> | <b>Site</b> | <b>S.O.F.</b> | <b>x/a</b> | <b>y/b</b> | <b>z/c</b> |
| La1                                                                   | 8f           | 1           |               | 0.30268(2) | 0.11939(2) | 0.31844(2) |
| La2                                                                   | 4e           | 2           |               | 0          | 0.09470(2) | 1/4        |
| Si1                                                                   | 8f           | 1           |               | 0.16020(4) | 0.03745(8) | 0.02912(5) |
| S1                                                                    | 8f           | 1           | 0.649(2)      | 0.06602(2) | 0.15741(5) | 0.54243(3) |
| S2                                                                    | 8f           | 1           | 0.892(2)      | 0.14478(3) | 0.24478(6) | 0.14602(4) |
| S3                                                                    | 8f           | 1           | 0.897(2)      | 0.21811(3) | 0.43077(6) | 0.41523(4) |
| S4                                                                    | 8f           | 1           | 0.956(2)      | 0.34993(3) | 0.39900(6) | 0.15931(5) |
| Se1                                                                   | 8f           | 1           | 0.351(2)      | 0.06602(2) | 0.15741(5) | 0.54243(3) |
| Se2                                                                   | 8f           | 1           | 0.108(2)      | 0.14478(3) | 0.24478(6) | 0.14602(4) |
| Se3                                                                   | 8f           | 1           | 0.103(2)      | 0.21811(3) | 0.43077(6) | 0.41523(4) |
| Se4                                                                   | 8f           | 1           | 0.044(2)      | 0.34993(3) | 0.39900(6) | 0.15931(5) |
| I1                                                                    | 4e           | 2           |               | 0          | 0.51393(3) | 1/4        |
| <b>Ce<sub>3</sub>Si<sub>2</sub>Se<sub>1.39</sub>S<sub>6.61</sub>I</b> |              |             |               |            |            |            |
| <b>Atom</b>                                                           | <b>Wyck.</b> | <b>Site</b> | <b>S.O.F.</b> | <b>x/a</b> | <b>y/b</b> | <b>z/c</b> |
| Ce1                                                                   | 8f           | 1           |               | 0.30182(2) | 0.12028(2) | 0.31787(2) |
| Ce2                                                                   | 4e           | 2           |               | 0          | 0.09532(2) | 1/4        |
| Si1                                                                   | 8f           | 1           |               | 0.16017(3) | 0.03766(6) | 0.02881(4) |
| S1                                                                    | 8f           | 1           | 0.6012(18)    | 0.06558(2) | 0.15962(4) | 0.54266(3) |
| S2                                                                    | 8f           | 1           | 0.8734(17)    | 0.14422(2) | 0.24640(5) | 0.14602(3) |
| S3                                                                    | 8f           | 1           | 0.8785(17)    | 0.21723(2) | 0.43140(5) | 0.41537(3) |
| S4                                                                    | 8f           | 1           | 0.9526(17)    | 0.35016(2) | 0.39933(5) | 0.16053(4) |
| Se1                                                                   | 8f           | 1           | 0.3988(18)    | 0.06558(2) | 0.15962(4) | 0.54266(3) |
| Se3                                                                   | 8f           | 1           | 0.1215(17)    | 0.21723(2) | 0.43140(5) | 0.41537(3) |
| Se2                                                                   | 8f           | 1           | 0.1266(17)    | 0.14422(2) | 0.24640(5) | 0.14602(3) |
| Se4                                                                   | 8f           | 1           | 0.0474(17)    | 0.35016(2) | 0.39933(5) | 0.16053(4) |
| I1                                                                    | 4e           | 2           |               | 0          | 0.51382(2) | 1/4        |
| <b>Pr<sub>3</sub>Si<sub>2</sub>Se<sub>1.22</sub>S<sub>6.78</sub>I</b> |              |             |               |            |            |            |
| <b>Atom</b>                                                           | <b>Wyck.</b> | <b>Site</b> | <b>S.O.F.</b> | <b>x/a</b> | <b>y/b</b> | <b>z/c</b> |
| Pr1                                                                   | 8f           | 1           |               | 0.30176(2) | 0.12067(2) | 0.31796(2) |
| Pr2                                                                   | 4e           | 2           |               | 0          | 0.09729(2) | 1/4        |
| Si1                                                                   | 8f           | 1           |               | 0.16002(2) | 0.03757(5) | 0.02851(4) |
| S1                                                                    | 8f           | 1           | 0.6471(15)    | 0.06540(2) | 0.16046(3) | 0.54230(2) |
| S2                                                                    | 8f           | 1           | 0.8938(15)    | 0.14413(2) | 0.24725(4) | 0.14619(3) |
| S3                                                                    | 8f           | 1           | 0.8926(15)    | 0.21678(2) | 0.43113(4) | 0.41511(3) |
| S4                                                                    | 8f           | 1           | 0.9557(15)    | 0.35047(2) | 0.39981(4) | 0.16192(3) |
| Se1                                                                   | 8f           | 1           | 0.3529(15)    | 0.06540(2) | 0.16046(3) | 0.54230(2) |
| Se2                                                                   | 8f           | 1           | 0.1062(15)    | 0.14413(2) | 0.24725(4) | 0.14619(3) |

|                                                                       |              |             |               |            |            |            |
|-----------------------------------------------------------------------|--------------|-------------|---------------|------------|------------|------------|
| Se3                                                                   | 8f           | 1           | 0.1074(15)    | 0.21678(2) | 0.43113(4) | 0.41511(3) |
| Se4                                                                   | 8f           | 1           | 0.0443(15)    | 0.35047(2) | 0.39981(4) | 0.16192(3) |
| I1                                                                    | 4e           | 2           |               | 0          | 0.51425(2) | 1/4        |
| <b>Nd<sub>3</sub>Si<sub>2</sub>Se<sub>1.18</sub>S<sub>6.82</sub>I</b> |              |             |               |            |            |            |
| <b>Atom</b>                                                           | <b>Wyck.</b> | <b>Site</b> | <b>S.O.F.</b> | <b>x/a</b> | <b>y/b</b> | <b>z/c</b> |
| Nd2                                                                   | 4e           | 2           |               | 0          | 0.09814(2) | 1/4        |
| Nd1                                                                   | 8f           | 1           |               | 0.30123(2) | 0.12100(2) | 0.31799(2) |
| Si1                                                                   | 8f           | 1           |               | 0.15986(3) | 0.03811(6) | 0.02813(4) |
| S1                                                                    | 8f           | 1           | 0.6453(18)    | 0.06531(2) | 0.16140(4) | 0.54172(2) |
| S2                                                                    | 8f           | 1           | 0.9034(17)    | 0.14394(2) | 0.24833(4) | 0.14637(3) |
| S3                                                                    | 8f           | 1           | 0.9002(17)    | 0.21673(2) | 0.43147(4) | 0.41509(3) |
| S4                                                                    | 8f           | 1           | 0.9624(17)    | 0.35075(2) | 0.39971(5) | 0.16293(3) |
| Se1                                                                   | 8f           | 1           | 0.3547(18)    | 0.06531(2) | 0.16140(4) | 0.54172(2) |
| Se3                                                                   | 8f           | 1           | 0.0998(17)    | 0.21673(2) | 0.43147(4) | 0.41509(3) |
| Se2                                                                   | 8f           | 1           | 0.0966(17)    | 0.14394(2) | 0.24833(4) | 0.14637(3) |
| Se4                                                                   | 8f           | 1           | 0.0376(17)    | 0.35075(2) | 0.39971(5) | 0.16293(3) |
| I1                                                                    | 4e           | 2           |               | 0          | 0.51448(2) | 1/4        |

**Table S3. Interatomic distances of Eu<sub>2</sub>SiSe<sub>x</sub>S<sub>4-x</sub>.**

|                                                                       |        |    |           |
|-----------------------------------------------------------------------|--------|----|-----------|
| <b>La<sub>3</sub>Si<sub>2</sub>Se<sub>1.21</sub>S<sub>6.79</sub>I</b> |        |    |           |
| La1                                                                   | S3 Se3 | 1x | 2.9529(5) |
| La1                                                                   | S4 Se4 | 1x | 2.9898(6) |
| La1                                                                   | S3 Se3 | 1x | 3.0161(5) |
| La1                                                                   | S1 Se1 | 1x | 3.0202(4) |
| La1                                                                   | S4 Se4 | 1x | 3.0635(6) |
| La1                                                                   | S3 Se3 | 1x | 3.0855(5) |
| La1                                                                   | S2 Se2 | 1x | 3.1082(5) |
| La1                                                                   | S2 Se2 | 1x | 3.1317(5) |
| La2                                                                   | S4 Se4 | 1x | 2.9420(5) |
| La2                                                                   | S4 Se4 | 1x | 2.9427(5) |
| La2                                                                   | S2 Se2 | 1x | 2.9877(5) |
| La2                                                                   | S2 Se2 | 1x | 2.9882(5) |
| La2                                                                   | S1 Se1 | 1x | 3.2842(3) |
| La2                                                                   | S1 Se1 | 1x | 3.2848(3) |
| La2                                                                   | S1 Se1 | 2x | 3.3183(4) |
| Si1                                                                   | S4 Se4 | 1x | 2.1157(8) |
| Si1                                                                   | S2 Se2 | 1x | 2.1244(8) |
| Si1                                                                   | S3 Se3 | 1x | 2.1547(8) |
| Si1                                                                   | S1 Se1 | 1x | 2.1908(7) |
| La•••La                                                               |        |    | 4.5034(5) |
| I•••I                                                                 |        |    | 5.4966(4) |
| <b>Ce<sub>3</sub>Si<sub>2</sub>Se<sub>1.39</sub>S<sub>6.61</sub>I</b> |        |    |           |
| Ce1                                                                   | S3 Se3 | 1x | 2.9338(4) |
| Ce1                                                                   | S4 Se4 | 1x | 2.9610(5) |

|                                                                       |        |    |           |
|-----------------------------------------------------------------------|--------|----|-----------|
| Ce1                                                                   | S3 Se3 | 1x | 2.9999(4) |
| Ce1                                                                   | S1 Se1 | 1x | 3.0048(4) |
| Ce1                                                                   | S4 Se4 | 1x | 3.0360(5) |
| Ce1                                                                   | S3 Se3 | 1x | 3.0657(4) |
| Ce1                                                                   | S2 Se2 | 1x | 3.0869(4) |
| Ce1                                                                   | S2 Se2 | 1x | 3.1109(4) |
| Ce2                                                                   | S4 Se4 | 1x | 2.9201(4) |
| Ce2                                                                   | S4 Se4 | 1x | 2.9203(4) |
| Ce2                                                                   | S2 Se2 | 2x | 2.9641(4) |
| Ce2                                                                   | S1 Se1 | 1x | 3.2723(3) |
| Ce2                                                                   | S1 Se1 | 1x | 3.2726(3) |
| Ce2                                                                   | S1 Se1 | 1x | 3.3055(3) |
| Ce2                                                                   | S1 Se1 | 1x | 3.3057(3) |
| Si1                                                                   | S4 Se4 | 1x | 2.1132(6) |
| Si1                                                                   | S2 Se2 | 1x | 2.1234(6) |
| Si1                                                                   | S3 Se3 | 1x | 2.1547(6) |
| Si1                                                                   | S1 Se1 | 1x | 2.1956(6) |
| Ce1                                                                   | S3 Se3 | 1x | 2.9338(4) |
| Ce•••Ce                                                               |        |    | 4.4610(5) |
| I••I                                                                  |        |    | 5.4690(4) |
| <b>Pr<sub>3</sub>Si<sub>2</sub>Se<sub>1.22</sub>S<sub>6.78</sub>I</b> |        |    |           |
| Pr1                                                                   | S3 Se3 | 1x | 2.9209(4) |
| Pr1                                                                   | S4 Se4 | 1x | 2.9403(4) |
| Pr1                                                                   | S1 Se1 | 1x | 2.9843(4) |
| Pr1                                                                   | S3 Se3 | 1x | 2.9865(4) |
| Pr1                                                                   | S4 Se4 | 1x | 3.0187(4) |
| Pr1                                                                   | S3 Se3 | 1x | 3.0470(4) |
| Pr1                                                                   | S2 Se2 | 1x | 3.0662(4) |
| Pr1                                                                   | S2 Se2 | 1x | 3.0932(4) |
| Pr2                                                                   | S4 Se4 | 1x | 2.9013(3) |
| Pr2                                                                   | S4 Se4 | 1x | 2.9020(3) |
| Pr2                                                                   | S2 Se2 | 1x | 2.9431(3) |
| Pr2                                                                   | S2 Se2 | 1x | 2.9437(3) |
| Pr2                                                                   | S1 Se1 | 1x | 3.2502(2) |
| Pr2                                                                   | S1 Se1 | 1x | 3.2505(2) |
| Pr2                                                                   | S1 Se1 | 1x | 3.3056(3) |
| Pr2                                                                   | S1 Se1 | 1x | 3.3058(3) |
| Si1                                                                   | S4 Se4 | 1x | 2.1143(5) |
| Si1                                                                   | S2 Se2 | 1x | 2.1215(5) |
| Si1                                                                   | S3 Se3 | 1x | 2.1512(5) |
| Si1                                                                   | S1 Se1 | 1x | 2.1874(5) |
| Pr•••Pr                                                               |        |    | 4.4350(5) |
| I••I                                                                  |        |    | 5.4450    |
| <b>Nd<sub>3</sub>Si<sub>2</sub>Se<sub>1.18</sub>S<sub>6.82</sub>I</b> |        |    |           |
| Nd2                                                                   | S4 Se4 | 1x | 2.8867(3) |
| Nd2                                                                   | S4 Se4 | 1x | 2.8874(3) |
| Nd2                                                                   | S2 Se2 | 1x | 2.9308(3) |
| Nd2                                                                   | S2 Se2 | 1x | 2.9314(3) |
| Nd2                                                                   | S1 Se1 | 1x | 3.2311(2) |

|         |        |    |           |
|---------|--------|----|-----------|
| Nd2     | S1 Se1 | 1x | 3.2314(2) |
| Nd2     | S1 Se1 | 1x | 3.3041(3) |
| Nd2     | S1 Se1 | 1x | 3.3043(3) |
| Nd1     | S3 Se3 | 1x | 2.9087(4) |
| Nd1     | S4 Se4 | 1x | 2.9225(4) |
| Nd1     | S1 Se1 | 1x | 2.9739(4) |
| Nd1     | S3 Se3 | 1x | 2.9744(4) |
| Nd1     | S4 Se4 | 1x | 3.0045(4) |
| Nd1     | S3 Se3 | 1x | 3.0294(4) |
| Nd1     | S2 Se2 | 1x | 3.0467(4) |
| Nd1     | S2 Se2 | 1x | 3.0776(4) |
| Si1     | S4 Se4 | 1x | 2.1115(5) |
| Si1     | S2 Se2 | 1x | 2.1187(6) |
| Si1     | S3 Se3 | 1x | 2.1467(6) |
| Si1     | S1 Se1 | 1x | 2.1857(6) |
| Nd•••Nd |        |    | 4.4065(5) |
| I•••I   |        |    | 5.4067(4) |

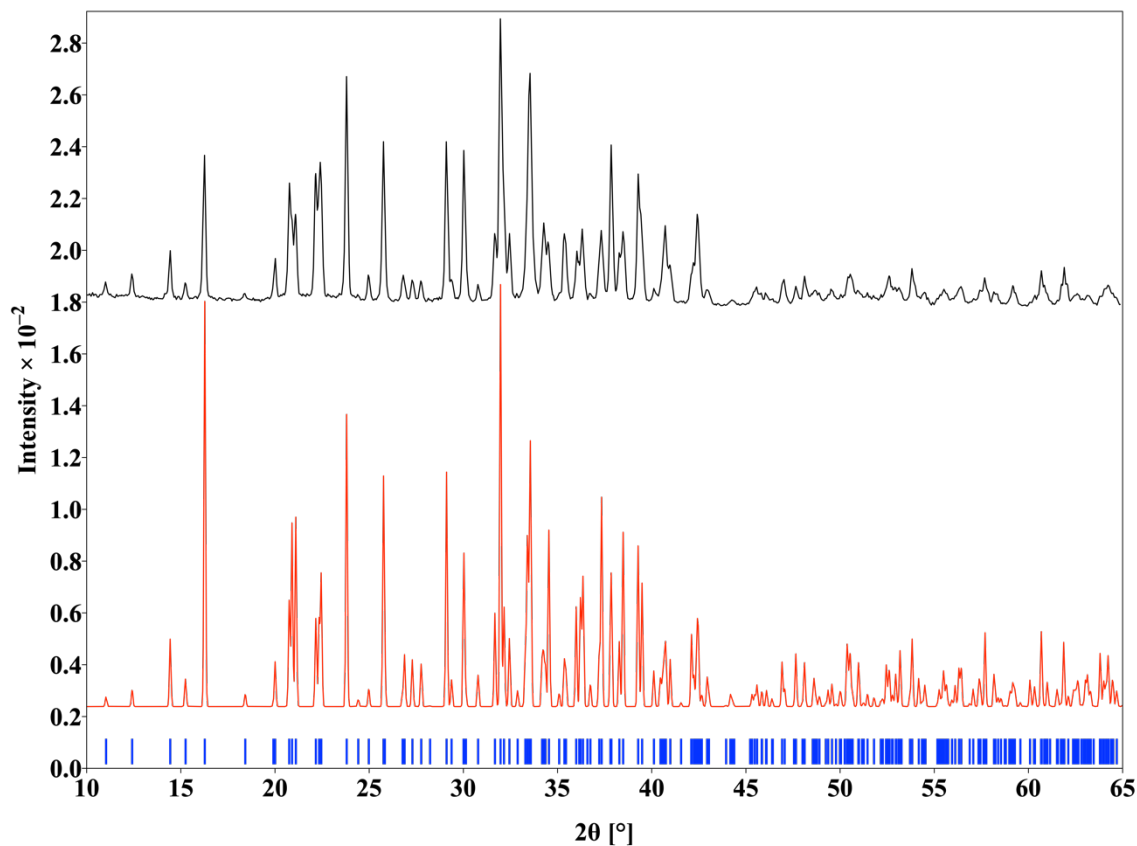

Figure S1. The PXR D pattern of polycrystalline  $\text{La}_3\text{Si}_2\text{Se}_{1.21}\text{S}_{6.79}\text{I}$  compound (simulated pattern (black) experimental pattern (red) and Bragg position (blue)).

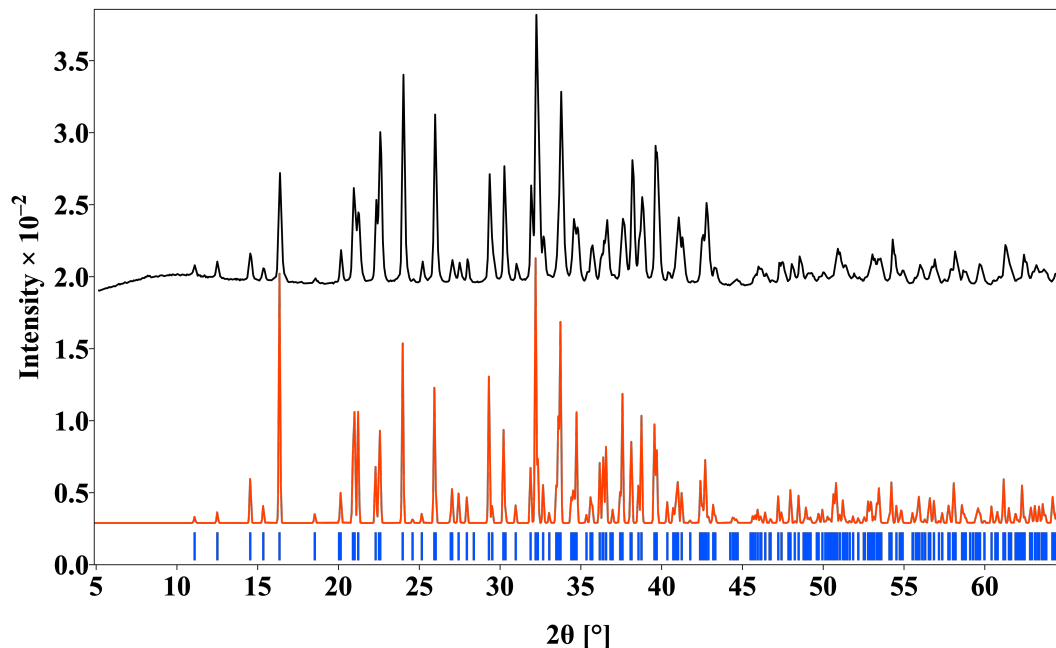

Figure S2. The PXRd pattern of polycrystalline  $\text{Ce}_3\text{Si}_2\text{Se}_{1.39}\text{S}_{6.61}\text{I}$  compound (simulated pattern (black) experimental pattern (red) and Bragg position (blue)).

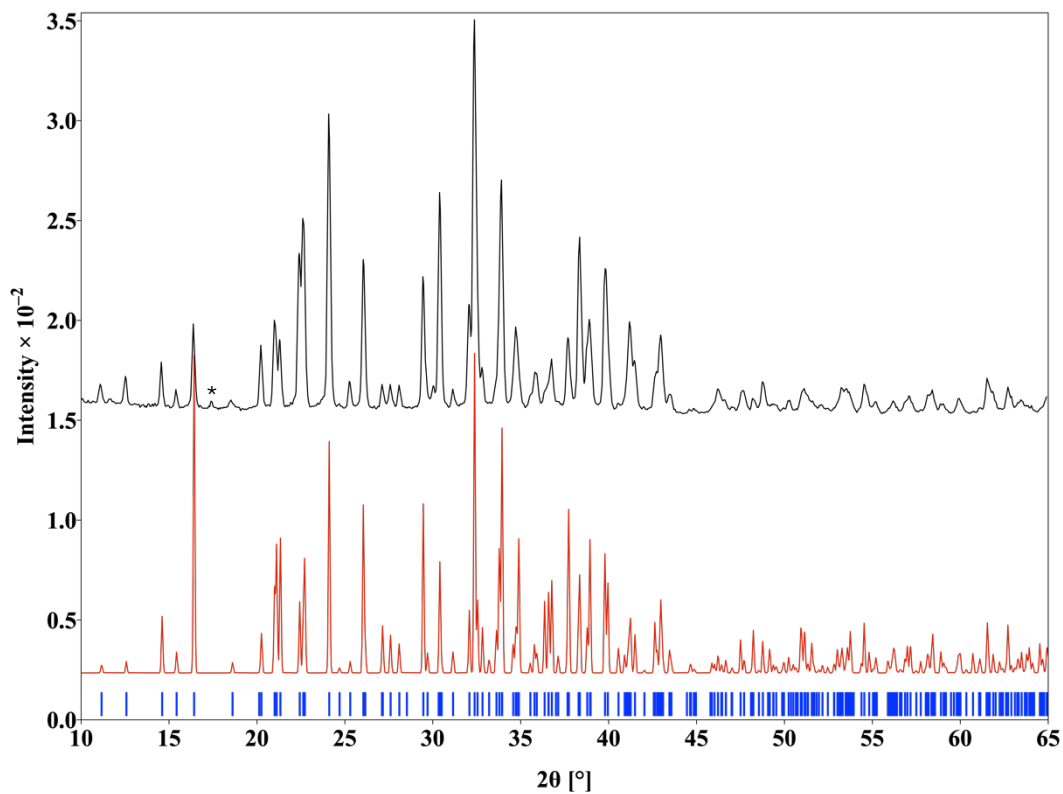

Figure S3. The pxd pattern of polycrystalline  $\text{Pr}_3\text{Si}_2\text{Se}_{1.22}\text{S}_{6.78}\text{I}$  compound (simulated pattern (black) experimental pattern (red) and Bragg position (blue)) (\* unidentified peaks).

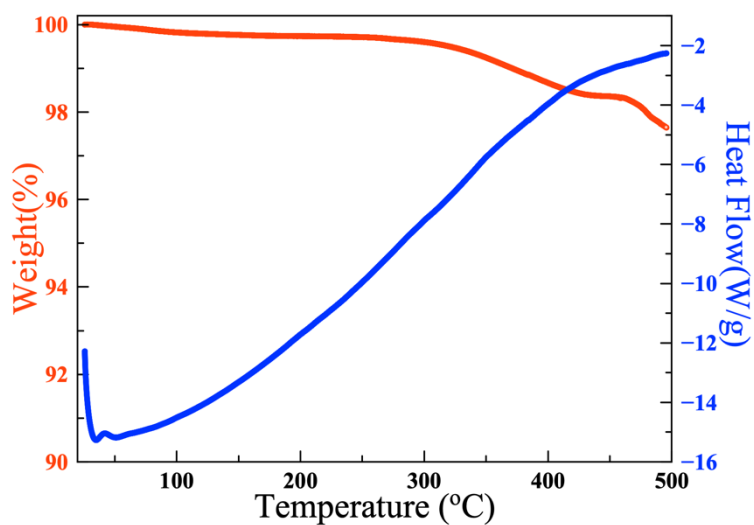

Figure. S4 TGA plot of polycrystalline  $\text{Ce}_3\text{Si}_2\text{Se}_{1.39}\text{S}_{6.61}\text{I}$  under  $\text{N}_2$  atmosphere.

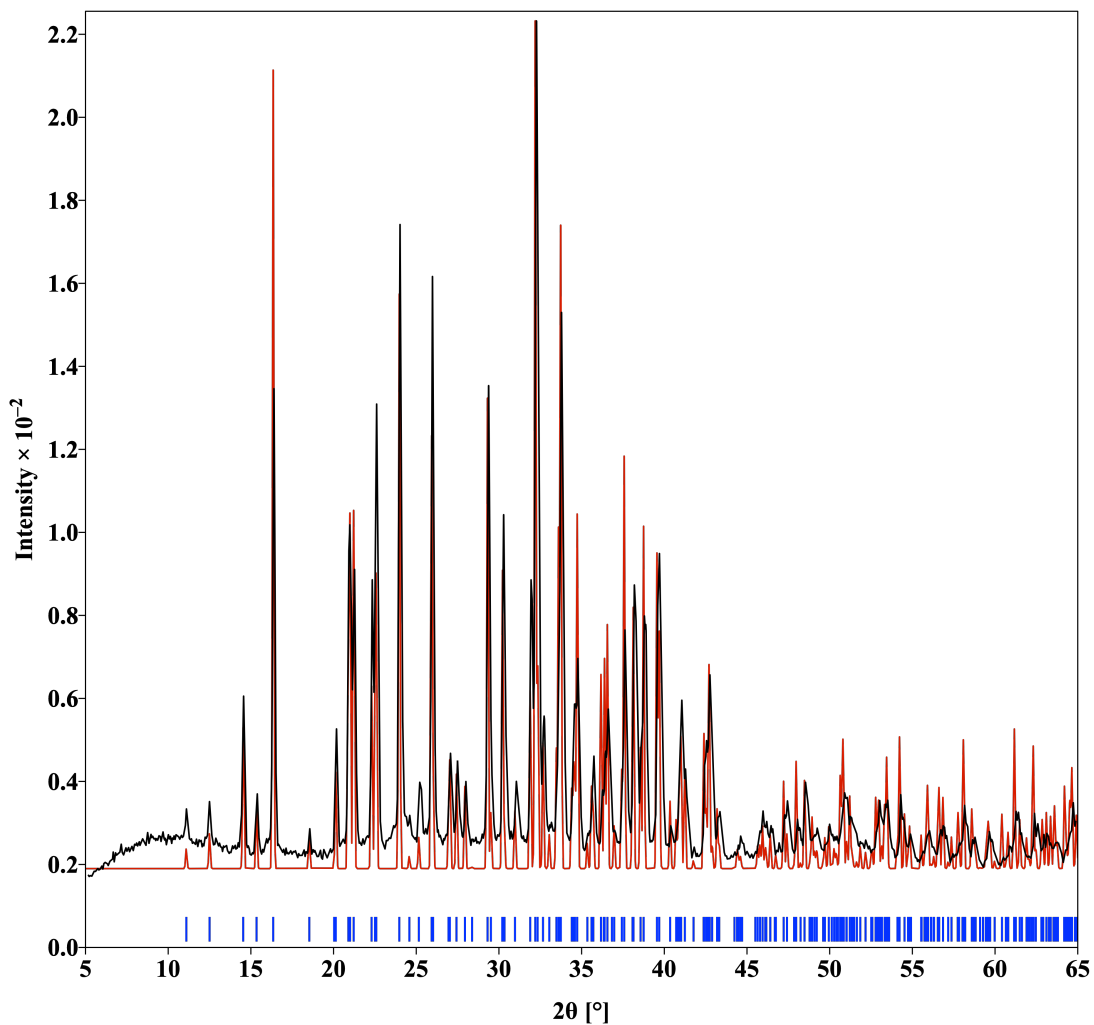

Figure S5. The PXRD pattern of polycrystalline  $\text{Ce}_3\text{Si}_2\text{Se}_{1.39}\text{S}_{6.61}\text{I}$  compound after TGA experiment (experimental pattern (black) simulated pattern (red) and Bragg position (blue)).

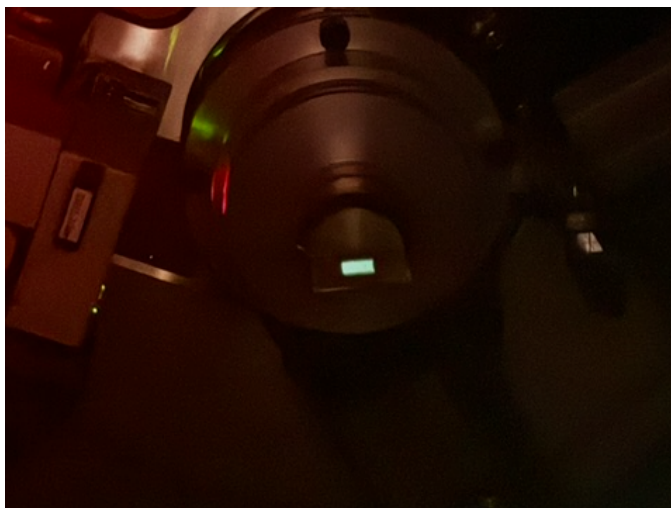

Figure S6. Scintillation of  $\text{Ce}_3\text{Si}_2\text{Se}_{1.39}\text{S}_{6.61}\text{I}$  under exposer of X-ray

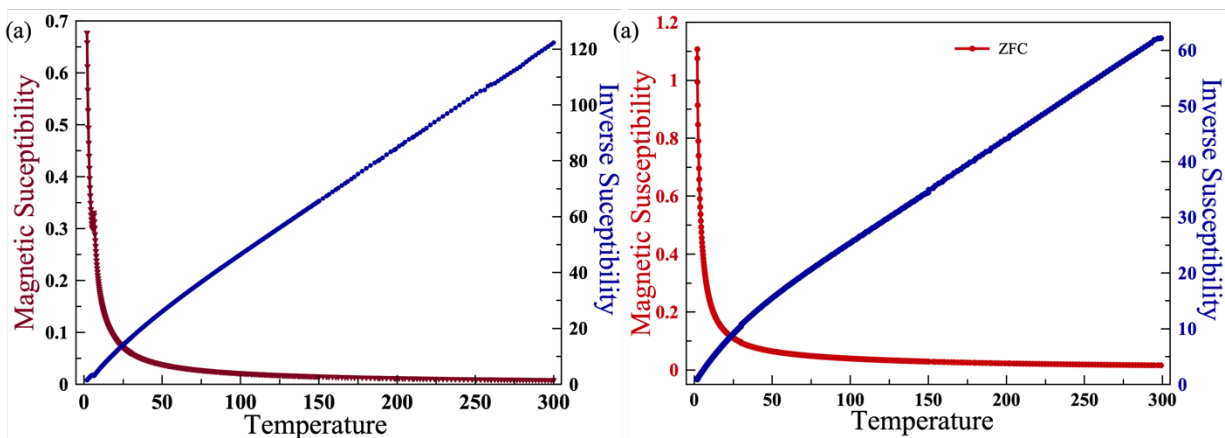

Figure S7. Molar and inverse molar magnetic susceptibility vs Temperature (ZFC) plots for (a)  $\text{Ce}_3\text{Si}_2\text{Se}_{1.39}\text{S}_{6.61}\text{I}$  and (b)  $\text{Nd}_3\text{Si}_2\text{Se}_{1.18}\text{S}_{6.82}\text{I}$ .
